# Supplementary figures and images for: Silver nitrate in silver zeolite A: three-dimensional incommensurate guest ordering in a zeolite framework
Source: Royal Society of Chemistry journal article supplement (doi:10.1039/b517094j), 2006-01-01

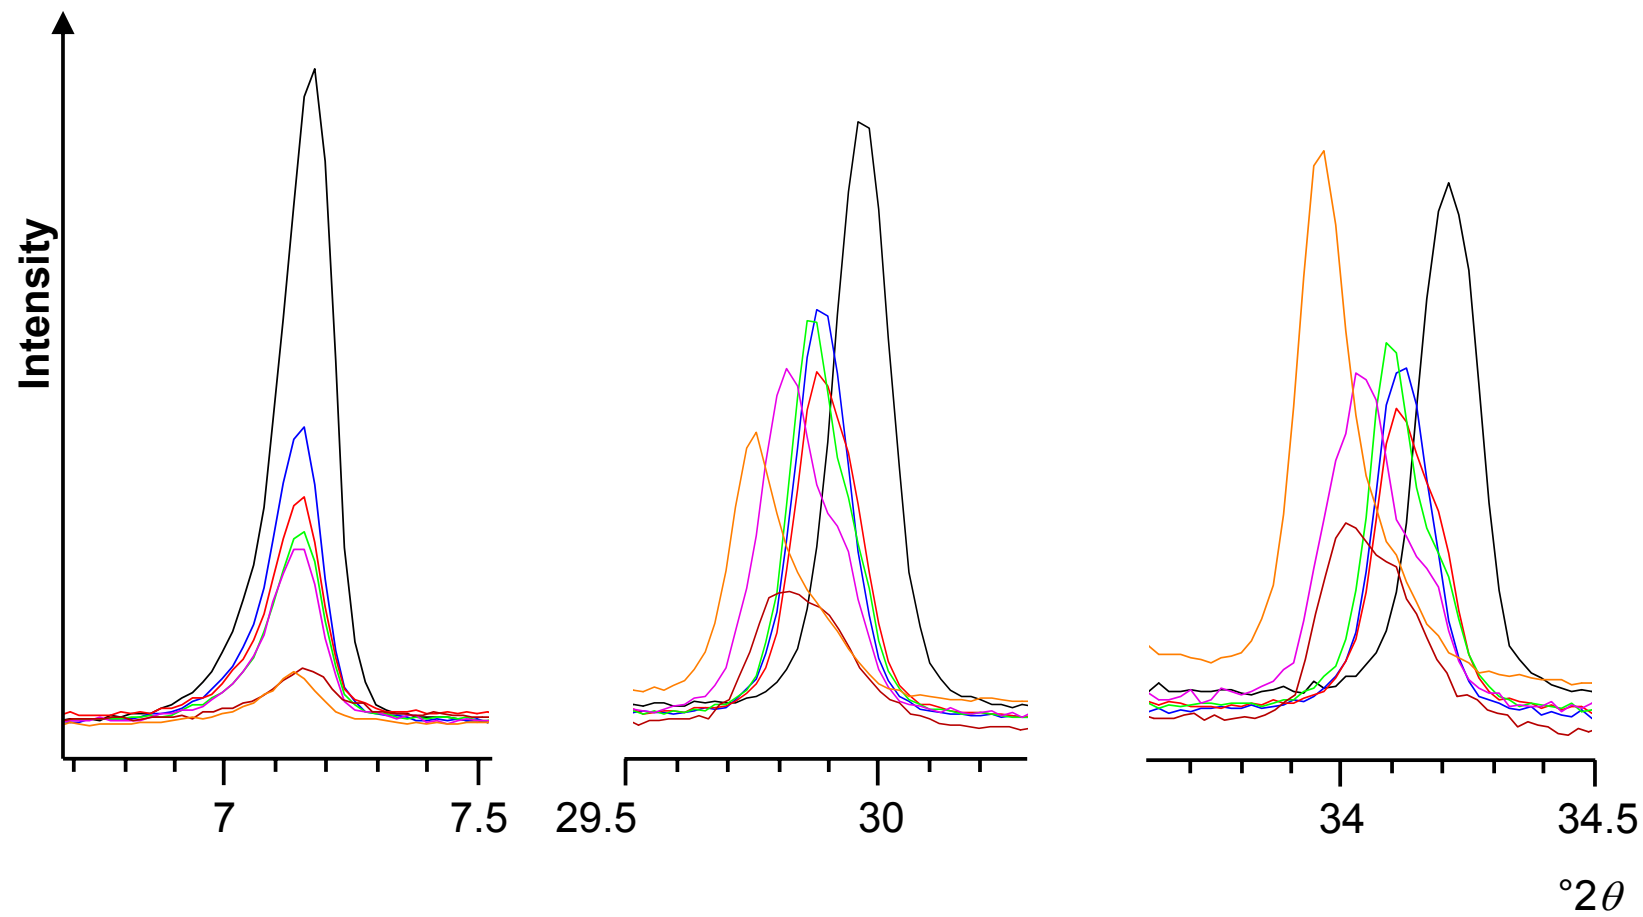

Supplement: b517094j.pdf [file b517094j.pdf]
